# Supplementary material for: Species Identification and Mycotoxigenic Potential of Aspergillus Section Flavi Isolated from Maize Marketed in the Metropolitan Region of Asunción, Paraguay
Source: MDPI journal article supplement (doi:10.3390/microorganisms11081879), 2023-07-25
Supplement: s1 [file s1]

## Supplementary Materials:

Table S1: MALDI-TOF mass spectra information (m/z) obtained for secondary metabolites.

| Compounds<br>(m/z)  | AFB1<br>(m/z) | AFB2<br>(m/z) | AFG1<br>(m/z) | AFG2<br>(m/z) | CPA<br>(m/z) |
|---------------------|---------------|---------------|---------------|---------------|--------------|
| [M+Na] <sup>+</sup> | 335,267       | 337,27        | 351,263       | 353,278       | 359,374      |
| [M+K] <sup>+</sup>  | 351,375       | 353,378       | 367,371       | 369,386       | 375,482      |
| [M+H] <sup>+</sup>  | 313,285       | 315,288       | 329,281       | 331,296       | 337,392      |

AFB1: Aflatoxin B1; AFB2: Aflatoxin B2; AFG1: Aflatoxin G1; AFG2: Aflatoxin G2; CPA: Cyclopiazonic acid

Table S2: *Aspergillus* sp. isolates used in this study for molecular analyses.

| Species                            | Code                                | Geographic Code/Synonym       | Origin                | GenBank Accession number |          | Reference |
|------------------------------------|-------------------------------------|-------------------------------|-----------------------|--------------------------|----------|-----------|
|                                    |                                     |                               |                       | ITS                      | CaM      |           |
|                                    |                                     |                               |                       |                          |          |           |
| <i>Aspergillus aflatoxiformans</i> | CBS 143679                          | A. aflatoxiformans_Min_Nig    | Nigeria               | MG662388                 | MG518076 | [30]      |
|                                    | CBS 135587                          | A. aflatoxiformans_Vwrang_Nig | Nigeria               | MG662387                 | MG518077 | [30]      |
| <i>Aspergillus alliaceus</i>       | DTO 363-F1                          | A. alliaceus_Esp              | Spain                 | MH279432                 | MG518146 | [30]      |
|                                    | DTO 363-E9                          | A.alliaceus_Pir_Esl           | Slovenia              | MH279431                 | MG518147 | [30]      |
| <i>Aspergillus arachidicola</i>    | DTO 228-H9                          | A. arachidicola_Buf_AfrSur    | South Africa          | MG662384                 | MG518091 | [30]      |
| <i>Aspergillus aspearensis</i>     | CBS 143672T                         | A. aspearensis_AspIsl_Ira     | Iran                  | MG662398                 | MG518040 | [30]      |
| <i>Aspergillus austwickii</i>      | CBS 143677T                         | A. austwickii_Abe_Nig         | Nigeria               | MG662391                 | MG518072 | [30]      |
| <i>Aspergillus caelatus</i>        | CBS 763.97T                         | A. caelatus_EUA               | USA                   | AF004930                 | MG518018 | [30]      |
| <i>Aspergillus caelatus</i>        | DTO 276-I2                          | A.caelatus_Cor_Arg            | Argentina             | -                        | MG518108 | [30]      |
| <i>Aspergillus cerealis</i>        | CBS 143674T                         | A. cerealis_Sha_Nig_1         | Nigeria               | MG662394                 | MG518063 | [30]      |
|                                    | DTO 228-F1 = IBT 32070              | A. cerealis_Sha_Nig_2         | Nigeria               | MG662392                 | MG518066 | [30]      |
| <i>Aspergillus flavus</i>          | CBS 100927 <sup>T</sup> = NRRL 1957 | A. flavus_Isl_Pac             | South Pacific Islands | AF027863                 | EF661508 | [30]      |
| <i>Aspergillus flavus</i>          | CBS 117637                          | A. flavus_For_Arg             | Argentina             | -                        | MG518010 | [30]      |
| <i>Aspergillus flavus</i>          | CBS 11055 = ATCC 12073              | A. flavus_Bra1                | Brazil                | FJ491463                 | MG518005 | [30]      |
| <i>Aspergillus flavus</i>          | CBS 118.62                          | A. flavus_Bra2                | Brazil                | -                        | MG517996 | [30]      |
| <i>Aspergillus flavus</i>          | CBS 119368                          | A. flavus_Chu_CorSur          | South Korea           | -                        | MG518002 | [30]      |
| <i>Aspergillus flavus</i>          | CBS 120.51                          | A. flavus_Lon_Ing             | United Kingdom        | EF661549                 | MG518012 | [30]      |
| <i>Aspergillus flavus</i>          | CBS 143688                          | A. flavus_CorSur1             | South Korea           | -                        | MG518144 | [30]      |
| <i>Aspergillus flavus</i>          | CBS 143689                          | A. flavus_CorSur2             | South Korea           | -                        | MG518145 | [30]      |
| <i>Aspergillus flavus</i>          | CBS 501.65                          | A. flavus_Ing                 | England               | EF661563                 | MG518015 | [30]      |
| <i>Aspergillus flavus</i>          | CBS 542.69                          | A. flavus_Kan_Jap             | Japan                 | EF661554                 | MG518016 | [30]      |
| <i>Aspergillus flavus</i>          | DTO 016-I5                          | A. flavus_Chi                 | China                 | -                        | MG518003 | [30]      |
| <i>Aspergillus flavus</i>          | DTO 062-C7                          | A. flavus_Ind1                | Indonesia             | -                        | MG517985 | [30]      |
| <i>Aspergillus flavus</i>          | DTO 062-C8                          | A. flavus_Ind2                | Indonesia             | -                        | MG517986 | [30]      |
| <i>Aspergillus flavus</i>          | DTO 062-H7                          | A. flavus_Ind3                | Indonesia             | -                        | MG517987 | [30]      |

|                            |                                   |                     |                 |          |              |      |
|----------------------------|-----------------------------------|---------------------|-----------------|----------|--------------|------|
| <i>Aspergillus flavus</i>  | DTO<br>066-C3                     | A. flavus_Ind4      | Indonesia       | -        | MG51798<br>9 | [30] |
| <i>Aspergillus flavus</i>  | DTO<br>087-A3                     | A. flavus_Ifa_Mad1  | Madagascar      | -        | MG51799<br>1 | [30] |
| <i>Aspergillus flavus</i>  | DTO<br>087-A4                     | A. flavus_Ifa_Mad2  | Madagascar      | -        | MG51799<br>2 | [30] |
| <i>Aspergillus flavus</i>  | DTO<br>215-E5                     | A. flavus_Nig       | Nigeria         | -        | MG51805<br>0 | [30] |
| <i>Aspergillus flavus</i>  | DTO<br>258-C9                     | A. flavus_Eur1      | East.<br>Europe | -        | MG51809<br>5 | [30] |
| <i>Aspergillus flavus</i>  | DTO<br>258-D6                     | A. flavus_Eur2      | East.<br>Europe | -        | MG51809<br>8 | [30] |
| <i>Aspergillus flavus</i>  | CBS<br>117638                     | A. flavus_Cor_Arg1  | Argentina       | -        | MG51801<br>1 | [30] |
| <i>Aspergillus flavus</i>  | DTO<br>276-H7                     | A. flavus_Cor_Arg2  | Argentina       | -        | MG51810<br>4 | [30] |
| <i>Aspergillus flavus</i>  | DTO<br>276-H8                     | A. flavus_Cor_Arg3  | Argentina       | -        | MG51810<br>5 | [30] |
| <i>Aspergillus flavus</i>  | DTO<br>276-H9                     | A. flavus_Cor_Arg4  | Argentina       | -        | MG51810<br>6 | [30] |
| <i>Aspergillus flavus</i>  | DTO<br>276-I1                     | A. flavus_Cor_Arg5  | Argentina       | -        | MG51810<br>7 | [30] |
| <i>Aspergillus flavus</i>  | DTO<br>276-I3                     | A. flavus_Cor_Arg6  | Argentina       | -        | MG51810<br>9 | [30] |
| <i>Aspergillus flavus</i>  | DTO<br>276-I4                     | A. flavus_Cor_Arg7  | Argentina       | -        | MG51811<br>0 | [30] |
| <i>Aspergillus flavus</i>  | DTO<br>276-I5                     | A. flavus_Cor_Arg8  | Argentina       | -        | MG51811<br>1 | [30] |
| <i>Aspergillus flavus</i>  | DTO<br>276-I6                     | A. flavus_Cor_Arg9  | Argentina       | -        | MG51811<br>2 | [30] |
| <i>Aspergillus flavus</i>  | DTO<br>276-I7                     | A. flavus_Cor_Arg10 | Argentina       | -        | MG51811<br>3 | [30] |
| <i>Aspergillus flavus</i>  | DTO<br>276-I8                     | A. flavus_Cor_Arg11 | Argentina       | -        | MG51811<br>4 | [30] |
| <i>Aspergillus flavus</i>  | DTO<br>281-E2                     | A. flavus_Tai1      | Thailand        | -        | MG51811<br>5 | [30] |
| <i>Aspergillus flavus</i>  | DTO<br>281-H8                     | A. flavus_Tai2      | Thailand        | -        | MG51811<br>6 | [30] |
| <i>Aspergillus flavus</i>  | DTO<br>285-F6                     | A. flavus_Tai3      | Thailand        | -        | MG51811<br>8 | [30] |
| <i>Aspergillus flavus</i>  | DTO<br>285-G3                     | A. flavus_Tai4      | Thailand        | -        | MG51811<br>9 | [30] |
| <i>Aspergillus flavus</i>  | DTO<br>285-I4                     | A. flavus_Tai5      | Thailand        | -        | MG51812<br>3 | [30] |
| <i>Aspergillus flavus</i>  | DTO<br>300-C7                     | A. flavus_Imp_Hol1  | Netherlands     | -        | MG51812<br>4 | [30] |
| <i>Aspergillus flavus</i>  | DTO<br>300-D7                     | A. flavus_Imp_Hol2  | Netherlands     | -        | MG51812<br>5 | [30] |
| <i>Aspergillus flavus</i>  | DTO<br>359-D7                     | A. flavus_CorSur1   | South<br>Korea  | -        | -            | [30] |
| <i>Aspergillus flavus</i>  | DTO<br>359-E1                     | A. flavus_CorSur2   | South<br>Korea  | -        | -            | [30] |
| <i>Aspergillus flavus</i>  | CBS<br>485.65 =<br>ATCC<br>16870  | A. flavus_Jap1      | Japan           | EF661563 | MG51801<br>4 | [30] |
| <i>Aspergillus lanosus</i> | CBS<br>650.74T                    | A. lanosus_Utt_Ind  | Indonesia       | FJ491471 | MG51801<br>7 | [30] |
| <i>Aspergillus leporis</i> | CBS<br>151.66T =<br>ATCC<br>16490 | A. leporis_Wyo_EUA1 | USA             | MH279391 | MG51803<br>3 | [30] |
| <i>Aspergillus leporis</i> | CBS<br>132153 =<br>DTO<br>210-E1  | A. leporis_Wyo_EUA2 | USA             | MH279396 | MG51804<br>8 | [30] |

|                                      |                           |                              |                |          |              |      |
|--------------------------------------|---------------------------|------------------------------|----------------|----------|--------------|------|
| <i>Aspergillus luteovirescens</i>    | CBS 620.95T               | A. luteovirescens_Amz_Bra    | Brazil         | MG662406 | MG51799<br>8 | [30] |
| <i>Aspergillus minisclerotigenes</i> | CBS 117635T               | A. minisclerotigenes_Cor_Arg | Argentina      | EF409239 | MG51800<br>9 | [30] |
|                                      | CBS 117633 = DTO 009-F5   | A. minisclerotigenes_For_Arg | Argentina      | MG662408 | MG51800<br>7 | [30] |
| <i>Aspergillus mottae</i>            | CBS 130016T = DTO 223- C8 | A. mottae_Brg_Por            | Portugal       | JF412767 | MG51805<br>8 | [30] |
| <i>Aspergillus neoalliaceus</i>      | CBS 143681T = DTO 326-D3  | A. neoalliaceus_RepChe1      | Czech Republic | MH279420 | MG51813<br>3 | [30] |
|                                      | DTO 326-E7                | A. neoalliaceus_RepChe2      | Czech Republic | MH279428 | MG51814<br>2 | [30] |
| <i>Aspergillus nomius</i>            | CBS 260.88T = NRRL 13137  | A.nomius_EUA                 | USA            | AF027860 | EF661531     | [30] |
|                                      | CBS 399.93 = DTO 301-I8   | A. nomius_Zha_Chi            | China          | FJ491472 | MG51812<br>7 | [30] |
| <i>Aspergillus novoparasiticus</i>   | CBS 126849T = DTO 223-C3  | A.novoparasiticus_SP_Bra1    | Brazil         | MG662397 | MG51805<br>5 | [30] |
|                                      | CBS 126850 = DTO 223- C5  | A.novoparasiticus_SP_Bra2    | Brazil         | MH279415 | MG51805<br>7 | [30] |
| <i>Aspergillus oryzae</i>            | CBS 102.07T               | A. oryzae_Des1               | Unknown source | EF661560 | EF661506     | [30] |
|                                      | NRRL 458 = ATCC 10063     | A. oryzae_Des2               | Unknown source | EF661562 | EF661507     | [30] |
| <i>Aspergillus parasiticus</i>       | CBS 260.67 = DTO 046- C2  | A. parasiticus_Jap           | Japan          | MG662400 | MG51801<br>3 | [30] |
| <i>Aspergillus pipericola</i>        | CBS 143680T               | A. pipericola_des            | Unknown source | MG662385 | MG51808<br>7 | [30] |
| <i>Aspergillus pseudocaelatus</i>    | CBS 117616T               | A.pseudocaelatus_Itu_Arg     | Argentina      | EF409242 | MG51799<br>5 | [30] |
| <i>Aspergillus pseudonomius</i>      | IBT 12657 = DTO 303-A4    | A. pseudonomius_des          | Unknown source | MH279418 | MG51812<br>8 | [30] |
|                                      | DTO 267-H7                | A. pseudonomius_Tai          | Thailand       | MH279417 | MG51810<br>2 | [30] |
| <i>Aspergillus sergii</i>            | CBS 130017T = DTO 223- C9 | A. sergii_Far_Por            | Portugal       | JF412769 | MG51805<br>9 | [30] |
| <i>Aspergillus subflavus</i>         | CBS 143683T = DTO 326- E8 | A. subflavus_Mov_Rum         | Rumania        | MH279429 | MG51814<br>3 | [30] |
| <i>Aspergillus tamarii</i>           | DTO 066-A1                | A.tamarii_Ind                | Indonesia      | -        | MG51798<br>8 | [30] |

|                                 |                                  |                        |                   |            |                |            |
|---------------------------------|----------------------------------|------------------------|-------------------|------------|----------------|------------|
| <i>Aspergillus vandermerwei</i> | DTO<br>199-A9 =<br>CBS<br>129201 | A.vandermerwei_Cal_EUA | USA               | MH279390   | MG51803<br>2   | [30]       |
| <i>Aspergillus muricatus</i>    | NRRL<br>35674                    | A. muricatus           | Unknown<br>source | EF661434.1 | EF661377.<br>1 | [30]       |
| <i>Aspergillus flavus</i>       | As 2                             |                        | Paraguay          | MN478355   | MN44316<br>0   | This study |
| <i>Aspergillus flavus</i>       | As 5                             |                        | Paraguay          | MN478356   | MN44316<br>1   | This study |
| <i>Aspergillus flavus</i>       | As 7                             |                        | Paraguay          | MN478357   | MN44317<br>4   | This study |
| <i>Aspergillus flavus</i>       | As 8                             |                        | Paraguay          | -          | MN44316<br>2   | This study |
| <i>Aspergillus flavus</i>       | As 10                            |                        | Paraguay          | MN478358   | MN44317<br>5   | This study |
| <i>Aspergillus flavus</i>       | As 21                            |                        | Paraguay          | -          | MN44317<br>6   | This study |
| <i>Aspergillus flavus</i>       | As 32                            |                        | Paraguay          | MN478359   | MN44317<br>7   | This study |
| <i>Aspergillus flavus</i>       | As 33                            |                        | Paraguay          | -          | MN44317<br>8   | This study |
| <i>Aspergillus flavus</i>       | As 34                            |                        | Paraguay          | -          | MN41602<br>3   | This study |
| <i>Aspergillus flavus</i>       | As 38                            |                        | Paraguay          | -          | MN44316<br>3   | This study |
| <i>Aspergillus flavus</i>       | As 41                            |                        | Paraguay          | MN478360   | MN44316<br>4   | This study |
| <i>Aspergillus flavus</i>       | As 54                            |                        | Paraguay          | -          | MN44318<br>0   | This study |
| <i>Aspergillus flavus</i>       | As 69                            |                        | Paraguay          | -          | MN44317<br>9   | This study |
| <i>Aspergillus flavus</i>       | As 70                            |                        | Paraguay          | MN478361   | MN44316<br>5   | This study |
| <i>Aspergillus flavus</i>       | As 76                            |                        | Paraguay          | -          | MN44316<br>6   | This study |
| <i>Aspergillus flavus</i>       | As 78                            |                        | Paraguay          | -          | MN44316<br>7   | This study |
| <i>Aspergillus flavus</i>       | As 79                            |                        | Paraguay          | -          | MN44316<br>8   | This study |
| <i>Aspergillus flavus</i>       | As 84                            |                        | Paraguay          | MN423342   | MN39323<br>2   | This study |
| <i>Aspergillus flavus</i>       | As 88                            |                        | Paraguay          | -          | MN39323<br>3   | This study |
| <i>Aspergillus flavus</i>       | As 93                            |                        | Paraguay          | MN423341   | MN41602<br>2   | This study |
| <i>Aspergillus flavus</i>       | As 96                            |                        | Paraguay          | MN423340   | MN41602<br>1   | This study |
| <i>Aspergillus flavus</i>       | As 101                           |                        | Paraguay          | MN478362   | MN44316<br>9   | This study |
| <i>Aspergillus flavus</i>       | As 103                           |                        | Paraguay          | MN478363   | MN44317<br>0   | This study |
| <i>Aspergillus flavus</i>       | As 118                           |                        | Paraguay          | MN478364   | MN44317<br>1   | This study |
| <i>Aspergillus flavus</i>       | As 138                           |                        | Paraguay          | -          | MN44317<br>2   | This study |
| <i>Aspergillus flavus</i>       | As 271                           |                        | Paraguay          | -          | MN44317<br>3   | This study |

|                               |       |          |          |              |            |
|-------------------------------|-------|----------|----------|--------------|------------|
| <i>Aspergillus flavus</i>     | As 17 | Paraguay | MN481409 | –            | This study |
| <i>Aspergillus flavus</i>     | As 22 | Paraguay | MN481410 | MN60418<br>3 | This study |
| <i>Aspergillus flavus</i>     | As 25 | Paraguay | MN481411 | MN60418<br>4 | This study |
| <i>Aspergillus flavus</i>     | As 27 | Paraguay | MN481412 | MN6041<br>85 | This study |
| <i>Aspergillus flavus</i>     | As 29 | Paraguay | MN481413 | MN60418<br>6 | This study |
| <i>Aspergillus flavus</i>     | As 35 | Paraguay | MN481414 | MN6041<br>87 | This study |
| <i>Aspergillus flavus</i>     | As 42 | Paraguay | MN481415 | –            | This study |
| <i>Aspergillus flavus</i>     | As 43 | Paraguay | MN481416 | MN60418<br>8 | This study |
| <i>Aspergillus flavus</i>     | As 98 | Paraguay | MN481417 | MN60418<br>9 | This study |
| <i>Aspergillus luchuensis</i> | As 4  | Paraguay | –        | MN60419<br>0 | This study |
| <i>Aspergillus flavus</i>     | As 16 | Paraguay | –        | MN6041<br>92 | This study |
| <i>Aspergillus flavus</i>     | As 67 | Paraguay | –        | MN60419<br>3 | This study |

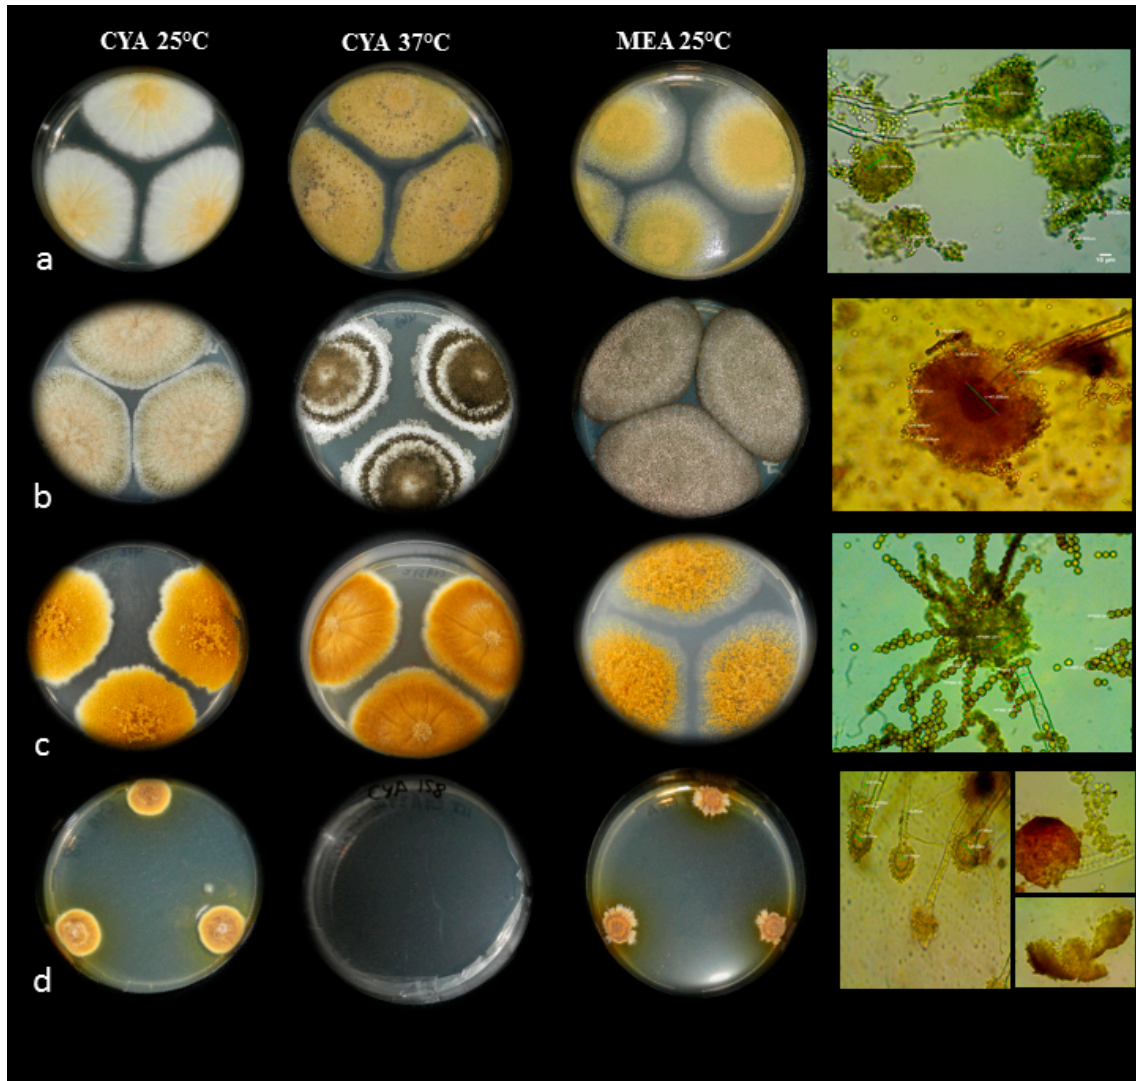

Figure S1: Morphological characteristics (macro- and microscopic) of *Aspergillus* morphotypes. a) *A. flavus* section *Flavi*; b) morphotype *A. awamori* section *Nigri*; c) morphotype *A. tamarii* section *Flavi*; d) morphotype *Aspergillus* section *Aspergillus*. First row: growth in CYA medium at 25 °C, second row: growth in CYA at 37 °C, third row: growth in MEA at 25 °C, fourth row: light microscope image at 40X magnification.

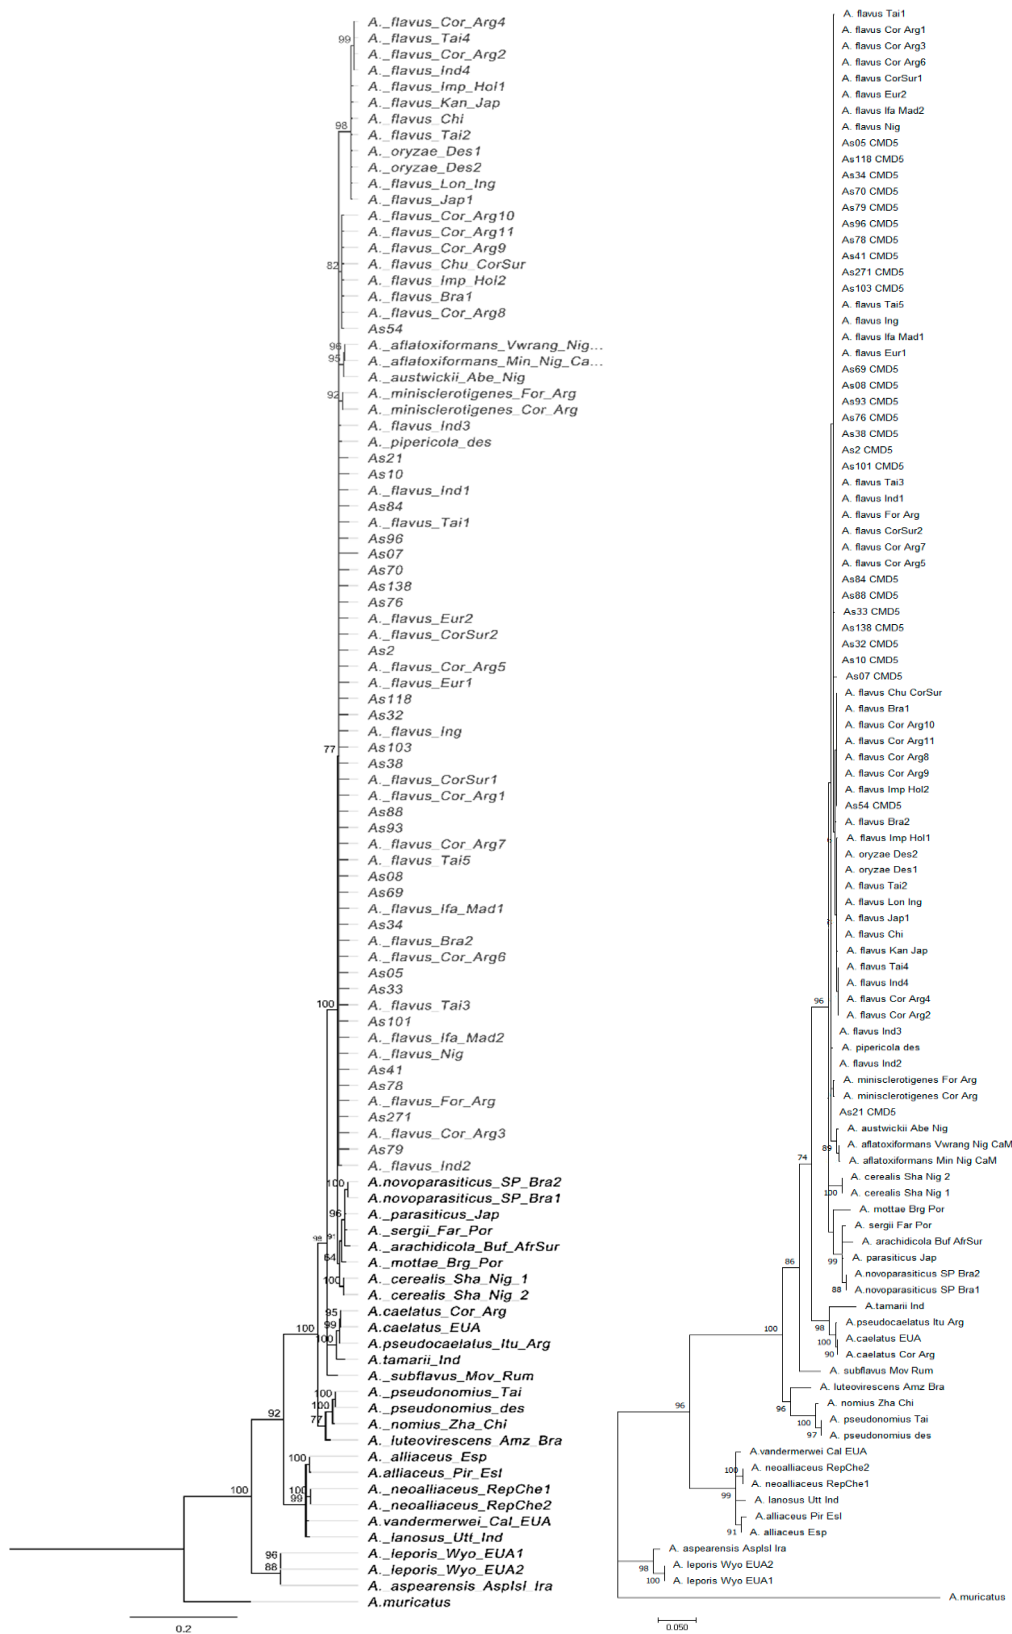

Figure S2. Phylogenetic tree inferred from the partial CaM sequences showing the relationships among members of *Aspergillus flavus*. On the left: phylogenetic tree using the Bayesian Inference based on the Bayesian Markov Chain Monte Carlo (MCMC) or Metropolis-coupled Markov chain Monte Carlo (MCMCMC) model. On the right: maximum likelihood (ML) tree. ML bootstrap support values over 75%, and Bayesian posterior predictive values over 75% are shown above the branches. The tree is rooted with *Aspergillus muricatus* EF661434.1.



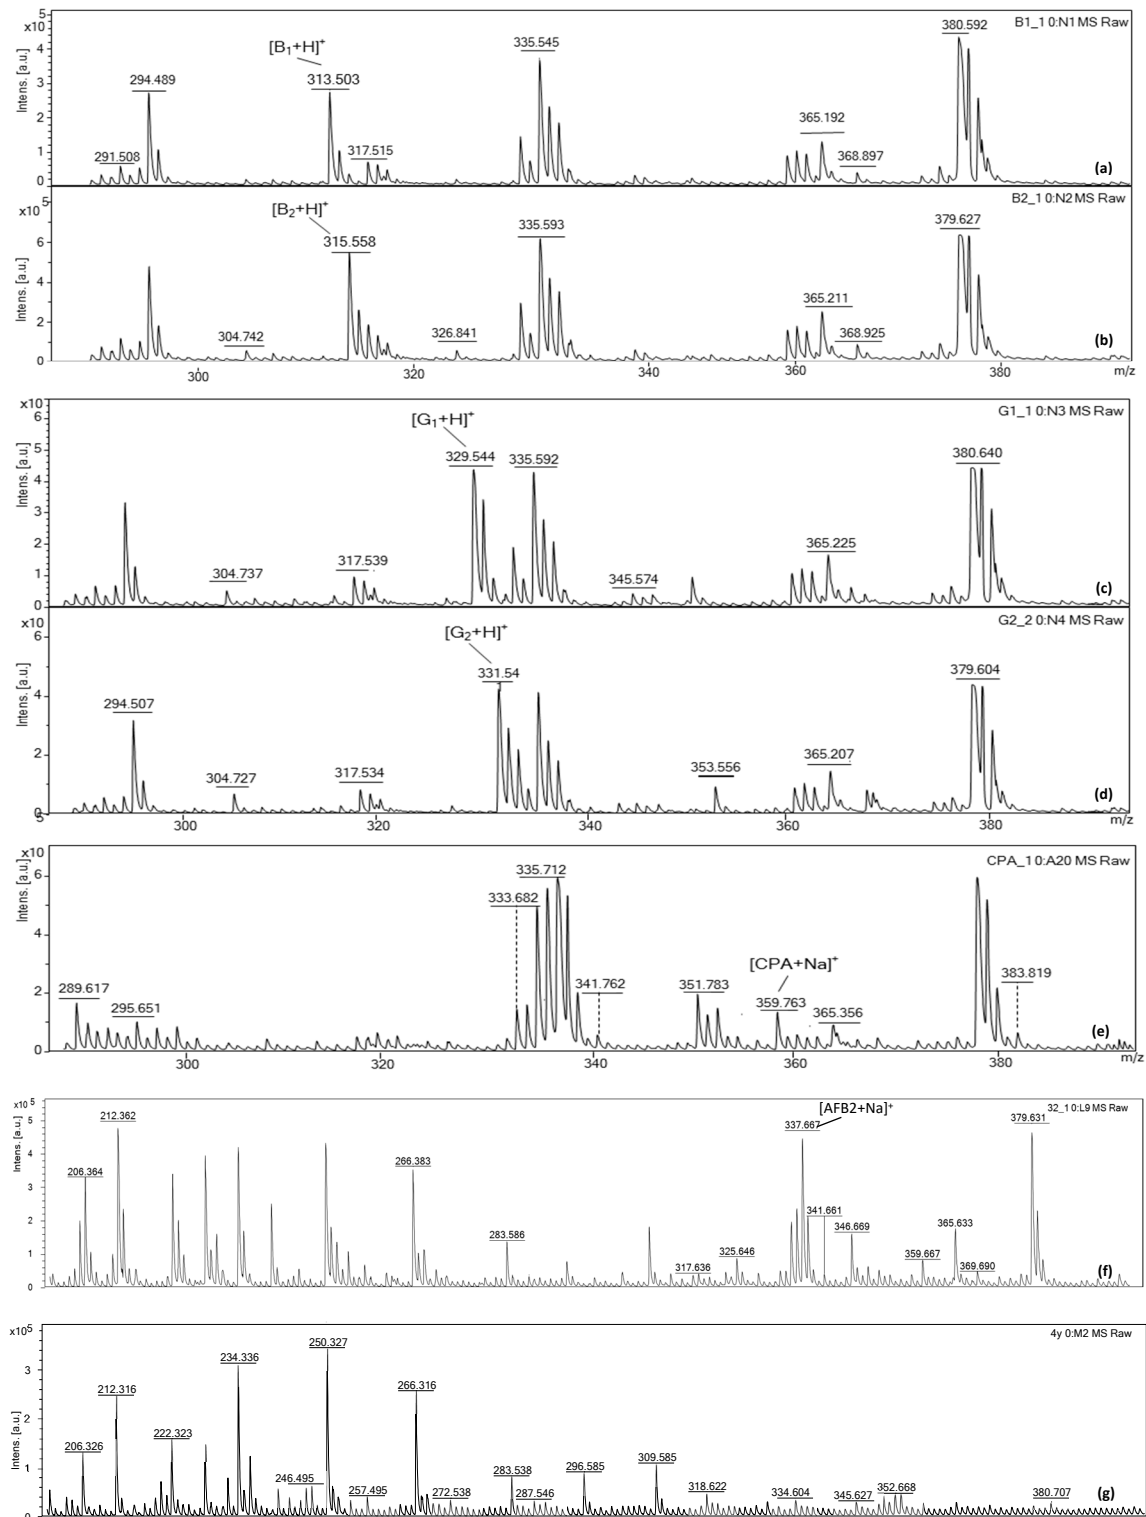

Figure S3: MALDI-TOF MS spectra with standards for aflatoxins B1 (a), B2 (b), G1 (c), G2 (d); Cyclopiazonic Acid (e) and samples positive for AFB2, AS 36 (f) and negative AS 10 (g).
